# Supplementary material
Source: Springer Nature journal article supplement (https://www.springermedizin.de/resource/supplementary/13014_2011_433_MOESM4_ESM.pdf/9633414)

A)

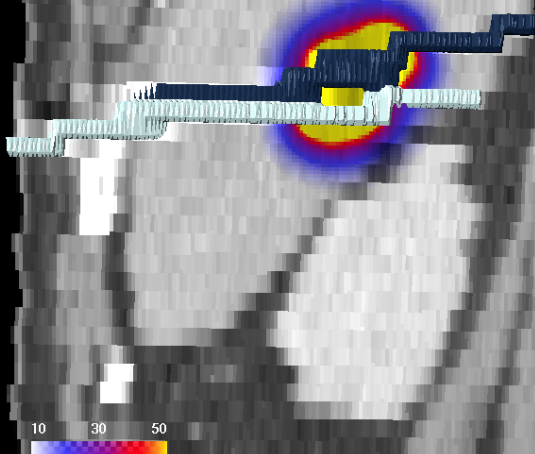

B)

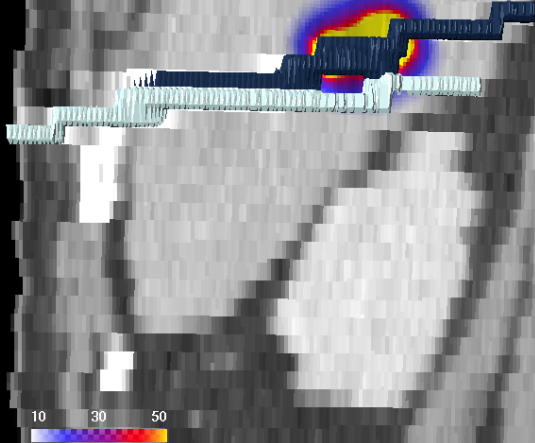

C)

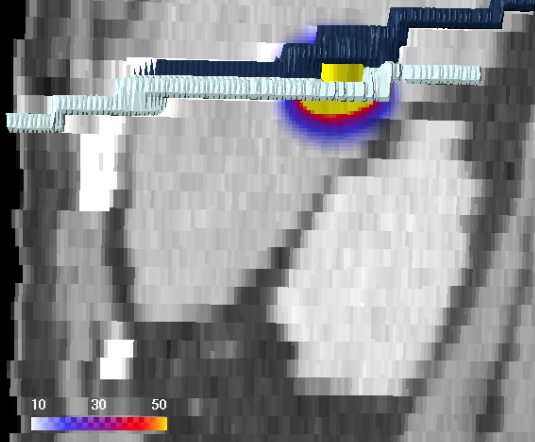

Supplement: MOESM4 [file 9633414]
